# Supplementary material for: In Silico Investigation of the Human GTP Cyclohydrolase 1 Enzyme Reveals the Potential of Drug Repurposing Approaches towards the Discovery of Effective BH4 Therapeutics
Source: MDPI journal article supplement (doi:10.3390/ijms24021210), 2023-01-07
Supplement: s1 [file s1]

| Structure                           | PBD code | Method of structure determination | Resolution Angstrom | Ligands                                                 |
|-------------------------------------|----------|-----------------------------------|---------------------|---------------------------------------------------------|
| GCH1 Bacterial                      | 1N3S     | X-ray crystallization             | 2.55                | GTP                                                     |
| GCH1 Human                          | 1FB1     | X-ray crystallization             | 3.01                | Zinc                                                    |
| GCH1 Human                          | 6Z86     | X-ray crystallization             | 2.21                | Zinc, 7-deaza GTP                                       |
| GCH1 Human                          | 6Z88     | X-ray crystallization             | 2.69                | Zinc, 5-azanyl-[1,3]thiazolo[5,4-d]pyrimidine-2,7-dione |
| GCH1-GFRP stimulatory complex Human | 6Z80     | EM                                | 3                   | Zinc, Phenylalanine, 8-oxo-GTP                          |
| GCH1-GFRP inhibitory complex Human  | 6Z85     | EM                                | 2.9                 | Zinc, 7,8-dihydrobiopterin                              |
| GFRP Human                          | 7ACC     | X-ray crystallization             | 2.04                | Potassium                                               |

Table S1. List of protein structures used for docking studies. EM: electron microscopy, GTP: guanosine triphosphate.

| Library                                                         | Number of Compounds | Database          | Description                                                                                                                          |
|-----------------------------------------------------------------|---------------------|-------------------|--------------------------------------------------------------------------------------------------------------------------------------|
| FDA approved                                                    | 1,500               | Zinc              | FDA approved drugs                                                                                                                   |
| Other (not FDA) Approved                                        | 4000                | Zinc              | Worldwide approved drugs non-FDA                                                                                                     |
| Natural products                                                | 1,500               | Zinc              | Approved natural products with <i>in vivo</i> efficacy                                                                               |
| FDA approved                                                    | 1100                | DrugBank          | FDA approved drugs                                                                                                                   |
| Worldwide (not FDA) approved                                    | 3,440               | DrugBank          | Worldwide approved drugs non-FDA                                                                                                     |
| Naturaceutical                                                  | 74                  | DrugBank          | Natraceuticals                                                                                                                       |
| Comprehensive library (composed of all compounds listed above*) | 7074                | DrugBank and Zinc | All FDA and worldwide approved medications and natural products in addition to natural products with verified physiological activity |

Table S2. Virtual screening library of compounds \*repeated structures excluded

| Drug Name  | Category                  | Interactions with key residues                                                                                                                                                                                                           | Docking Score kcal/mol | Docking Pose                                                                         |
|------------|---------------------------|------------------------------------------------------------------------------------------------------------------------------------------------------------------------------------------------------------------------------------------|------------------------|--------------------------------------------------------------------------------------|
| 7-deazaGTP | Inactive substrate        | H bonds, salt bridge, Pi stacking, hydrophobic bonds observed with the following key binding residues:<br>ARG 97,<br>ASN 118,<br>HIE 144,<br>SER 166,<br>LEU 163,<br>LYS 167,<br>ARG 170,<br>GLN 182,<br>GLU 183,<br>HIE 210,<br>ARG 216 | -14.94                 | 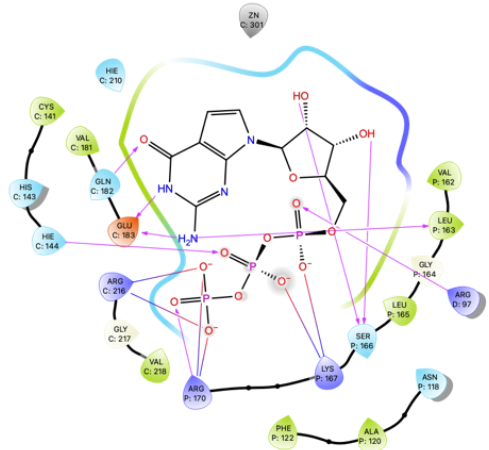   |
| Polydatin  | Natural product           | H bonds, Pi stacking, hydrophobic<br>GLN 182,<br>GLU 183,<br>HIE 210                                                                                                                                                                     | -10.51                 |  |
| Fdump      | Cytotoxic anti-neoplastic | H bonds, Pi stacking, hydrophobic bonds and salt bridges<br>HIE 144,<br>SER 166,<br>LYS 167,<br>ARG 170,<br>ARG 216                                                                                                                      | -10.29                 |  |

|                     |                                              |                                                                                                                         |        |                                                                                      |
|---------------------|----------------------------------------------|-------------------------------------------------------------------------------------------------------------------------|--------|--------------------------------------------------------------------------------------|
| thioxanthyllic acid | Metabolite of azathioprine immunosuppressant | H bonds, Pi stacking, and salt bridges<br>HIE 144,<br>SER 166,<br>LYS 167,<br>ARG 170,<br>ARG 216                       | -10.01 | 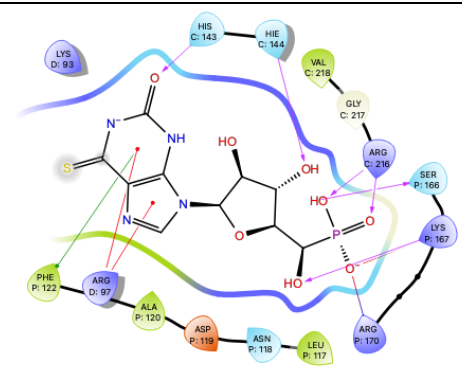   |
| Phlorofucofuroeckol | Natural product<br>Anti-cancer activity      | H bonds, Pi cation, hydrophobic bonds<br>ARG 97,<br>ASN 118,<br>SER 166,<br>LYS 167,<br>GLN 182,<br>GLU 183,<br>ARG 216 | -10.02 |   |
| Fosphenytoin        | Antiepileptic                                | H bonds, Pi stacking, Pi cation, hydrophobic<br>ARG 97,<br>HIE 144,<br>LYS 167,<br>ARG 170,<br>ARG 216                  | -9.96  |  |
| Masprocol           | antineoplastic                               | H bonds, hydrophobic bonds<br>ARG 97,<br>ASN 118,<br>LYS 167,<br>GLN 182,<br>GLU 183                                    | -9.83  |  |

|                      |                 |                                                                                                                                             |       |                                                                                      |
|----------------------|-----------------|---------------------------------------------------------------------------------------------------------------------------------------------|-------|--------------------------------------------------------------------------------------|
| Penciclovir          | Antiviral       | H bonds,<br>salt bridge,<br>hydrophobic<br>ASN 118,<br>HIE 144,<br>LYS 167,<br>GLU 183<br>ARG 170,<br>ARG 216                               | -8.97 | 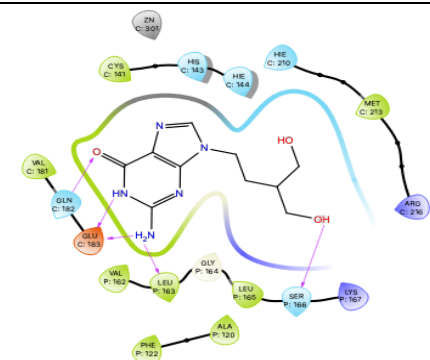   |
| Fludarabin phosphate | anti-neoplastic | H bonds,<br>salt bridge,<br>Pi stacking,<br>Pi cation,<br>hydrophobic<br>ASN 118,<br>HIE 144,<br>LYS 167,<br>GLU 183<br>ARG 170,<br>ARG 216 | -9.39 |    |
| Tenofovir            | Antiviral       | H bonds,<br>salt bridge,<br>Pi stacking,<br>Pi cation,<br>hydrophobic<br>ARG 97,<br>ARG 170,<br>HIE 210,<br>ARG 216                         | -9.14 |   |
| Eckol                | Natural product | H bonds, Pi<br>stacking,<br>hydrophobic<br>bonds.<br>ARG 97,<br>ASN 118,<br>HIE 144,                                                        | -8.59 |  |

|                |                        |                                                                                                                                                                |       |                                                                                      |
|----------------|------------------------|----------------------------------------------------------------------------------------------------------------------------------------------------------------|-------|--------------------------------------------------------------------------------------|
| Inosine        | Nucleoside /supplement | H bonds,<br>hydrophobic<br>SER 166,<br>GLN 182,<br>GLU 183,<br>HIE 210                                                                                         | -8.45 | 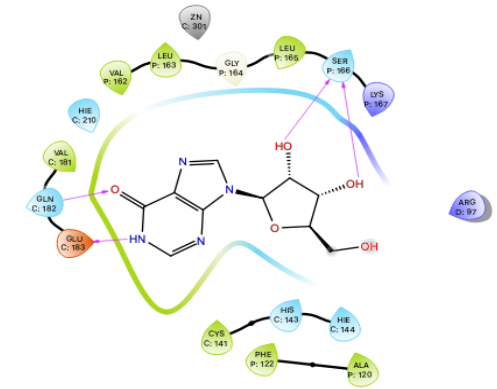   |
| Valganciclovir | Antiviral              | H bonds,<br>hydrophobic<br>ASN 118,<br>HIE 144,<br>SER 166,<br>LEU 163,<br>LYS 167,<br>ARG 170,<br>GLN 182,<br>GLU 183,<br>HIE 210                             | -8.34 |   |
| Fosfomycin     | Antibiotic             | H bonds,<br>salt bridge,<br>hydrophobic<br>ASN 118,<br>HIE 144,<br>SER 166,<br>LEU 163,<br>LYS 167,<br>ARG 170,<br>GLN 182,<br>GLU 183,<br>HIE 210,<br>ARG 216 | -7.85 |  |
| Olsalazine     | Anti-inflammatory      | H bonds,<br>salt bridge,<br>Pi stacking,<br>hydrophobic<br>ASN 118,<br>HIE 144,<br>SER 166,<br>LEU 163,<br>LYS 167,<br>ARG 170,                                | -7.53 |  |

|                    |                                          |    |                                                                                                                    |       |  |
|--------------------|------------------------------------------|----|--------------------------------------------------------------------------------------------------------------------|-------|--|
|                    |                                          |    | GLN 182,<br>GLU 183,<br>HIE 210,<br>ARG 216                                                                        |       |  |
| Phenytoin catechol | Metabolite<br>phenytoin<br>antiepileptic | of | H bonds, Pi<br>stacking,<br>hydrophobic<br>bonds and<br>salt bridges<br>ARG 97,<br>HIE 144,<br>SER 166,<br>LYS 167 | -7.19 |  |
| Vaborbactam        | Antibiotic                               |    | H bonds,<br>salt bridge,<br>hydrophobic<br>SER 166,<br>LYS 167,<br>ARG 170,<br>ARG 216                             | -7.10 |  |

Table S3: Docking scores and 2D poses of identified hit compounds screening against the GCH1 active site.

| Properties       | Parameters              | Olsalazine       | Phenytoin catechol | Phlorofucofuroeckol     | Eckol                       | Inosine               | Valganciclovir   |
|------------------|-------------------------|------------------|--------------------|-------------------------|-----------------------------|-----------------------|------------------|
| Physio-chemical  | MW (g/mol)              | 302.24           | 284.27             | 602.46                  | 372.28                      | 268.23                | 390.39           |
|                  | Heavy atoms             | 22               | 21                 | 44                      | 27                          | 19                    | 28               |
|                  | Aromatic heavy atoms    | 12               | 12                 | 31                      | 18                          | 9                     | 12               |
|                  | H-bond acceptors        | 8                | 4                  | 14                      | 9                           | 7                     | 8                |
|                  | H-bond donors           | 4                | 4                  | 9                       | 6                           | 4                     | 6                |
| Lipophilicity    | Log P <sub>o/w</sub>    | 2.01             | 1.05               | 3.24                    | 1.83                        | -1.56                 | 0.62             |
| Water Solubility | Log S (ESOL)            | -3.83<br>Soluble | -2.74<br>Soluble   | -6.77<br>Poorly soluble | -4.06<br>Moderately soluble | -0.90<br>Very soluble | -2.90<br>Soluble |
| PK               | GI absorption           | Low-Moderate     | High               | Low                     | Moderate                    | Moderate              | Low              |
|                  | BBB permeability        | nil              | nil                | nil                     | nil                         | nil                   | nil              |
|                  | CYP450 inhibitor        | No               | No                 | Yes CYP2C9              | Yes CYP2C9                  | No                    | No               |
|                  | Bioavailability score   | 0.56             | 0.55               | 0.17                    | 0.55                        | 0.55                  | 0.55             |
| Toxicity         | Hepatotoxicity          | +                | +                  | nil                     | +                           | nil                   | nil              |
|                  | Carcinogenicity         | nil              | nil                | nil                     | nil                         | nil                   | nil              |
| Status           | Clinically approved     | Yes              | Yes                |                         |                             | Yes                   | Yes              |
|                  | Experimental (clinical) |                  |                    | Yes                     | Yes                         |                       |                  |

Table S4: ADMET profile for the top six hit drugs and naturaceuticals. Verified and predicted values derived from PubChem database and using SwissADME and Schrodinger's ADME/Tox prediction tool.

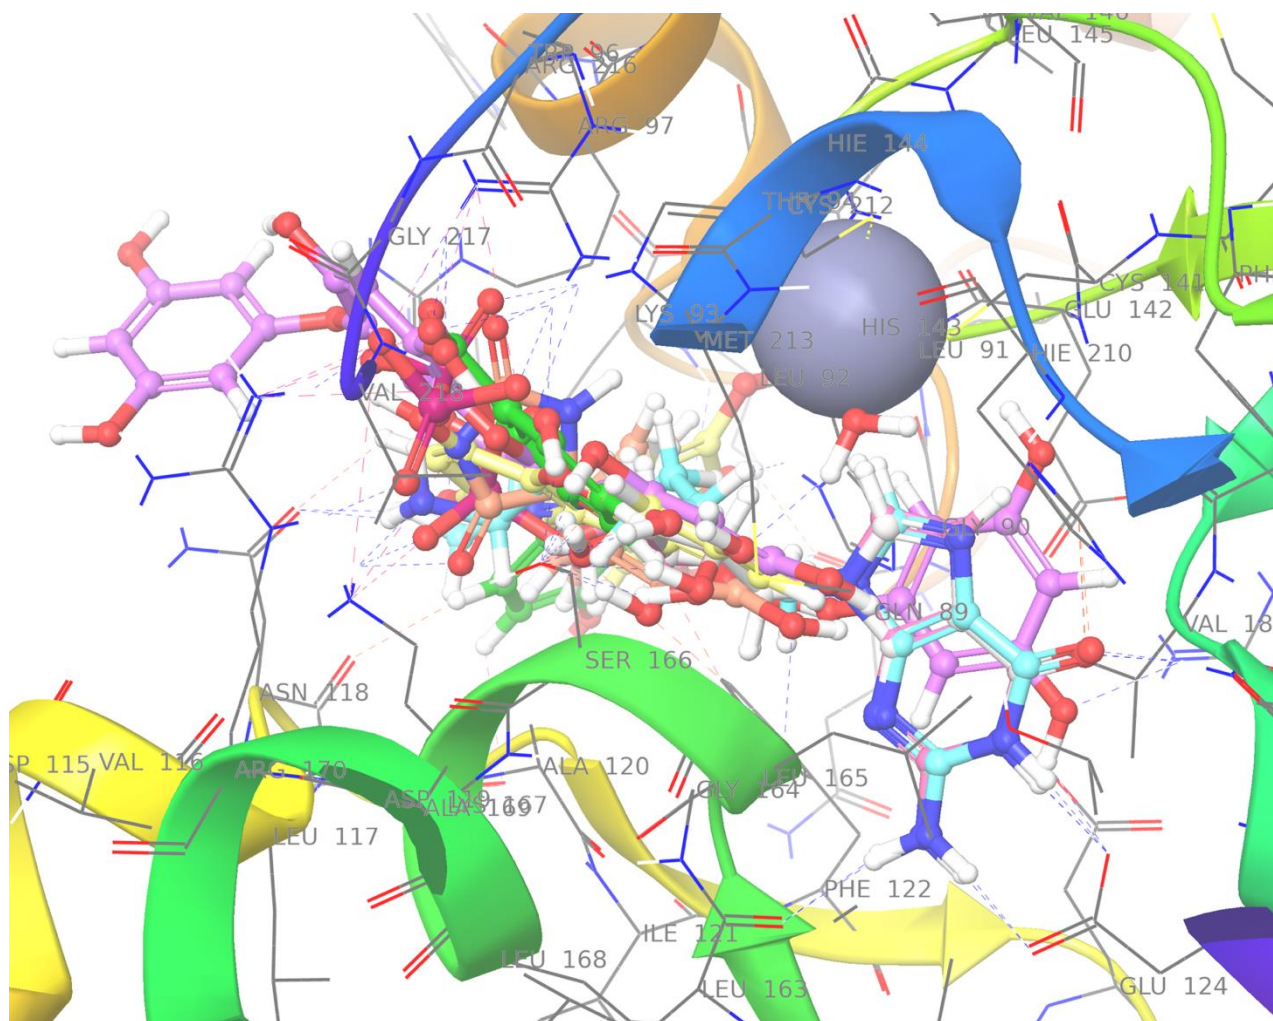

Figure S1: All fifteen hit compounds docked superimposed in the GTPCH1 binding pocket. Interactions are shown as dotted lines.



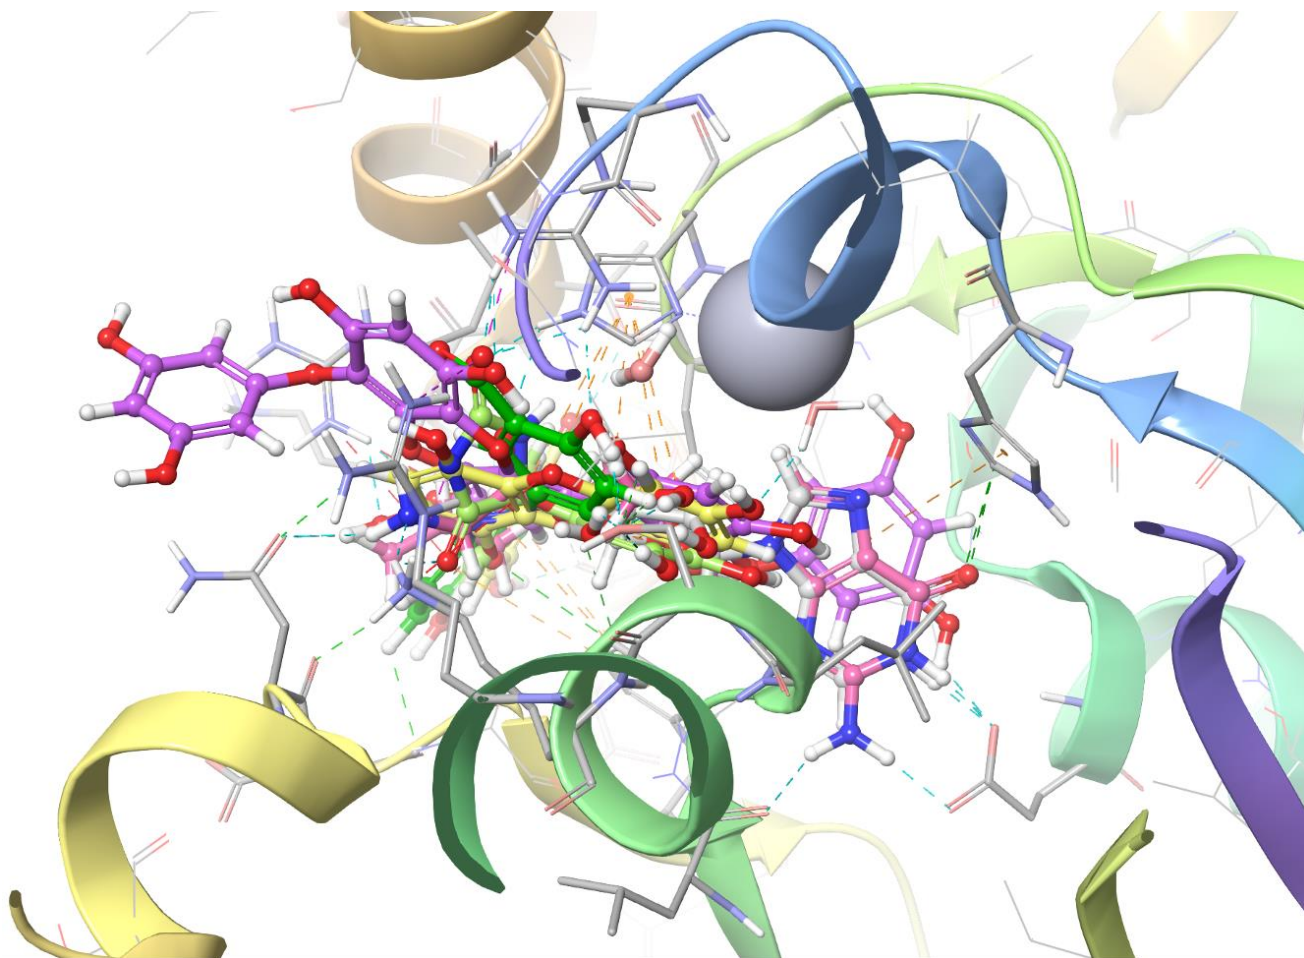

Figure S2: All six hit compounds and the control ligand docked and superimposed in the GTPCH1 binding pocket. Interactions are shown as dotted lines. Binding residues are depicted in grey bold wire, zinc ion as a grey sphere.

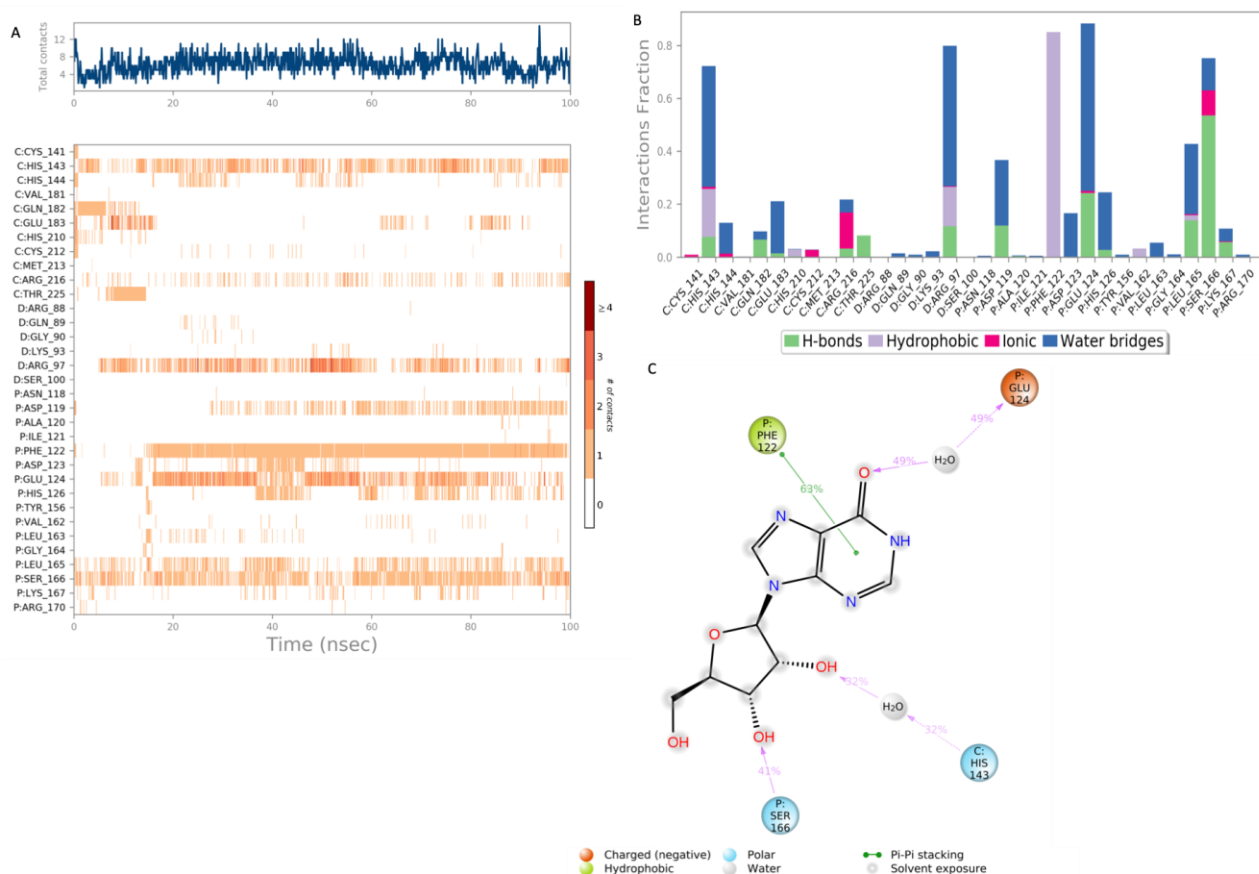

Figure S3: Interaction diagram of inosine with the GTPCH1 binding pocket. (A) Interaction of inosine with residues in each trajectory frame. The depth of color indicating the higher the interaction with contact residues; (B) The protein-ligand contacts showing the bonding interactions fraction and the nature of the interactions; (C) Graphical 2D illustration of inosine interacting with the protein residues during MD simulation. Interactions shown are occurring more than 30% during the simulation time. C: chain C of the GTPCH1 binding pocket, P: chain P of the binding pocket.

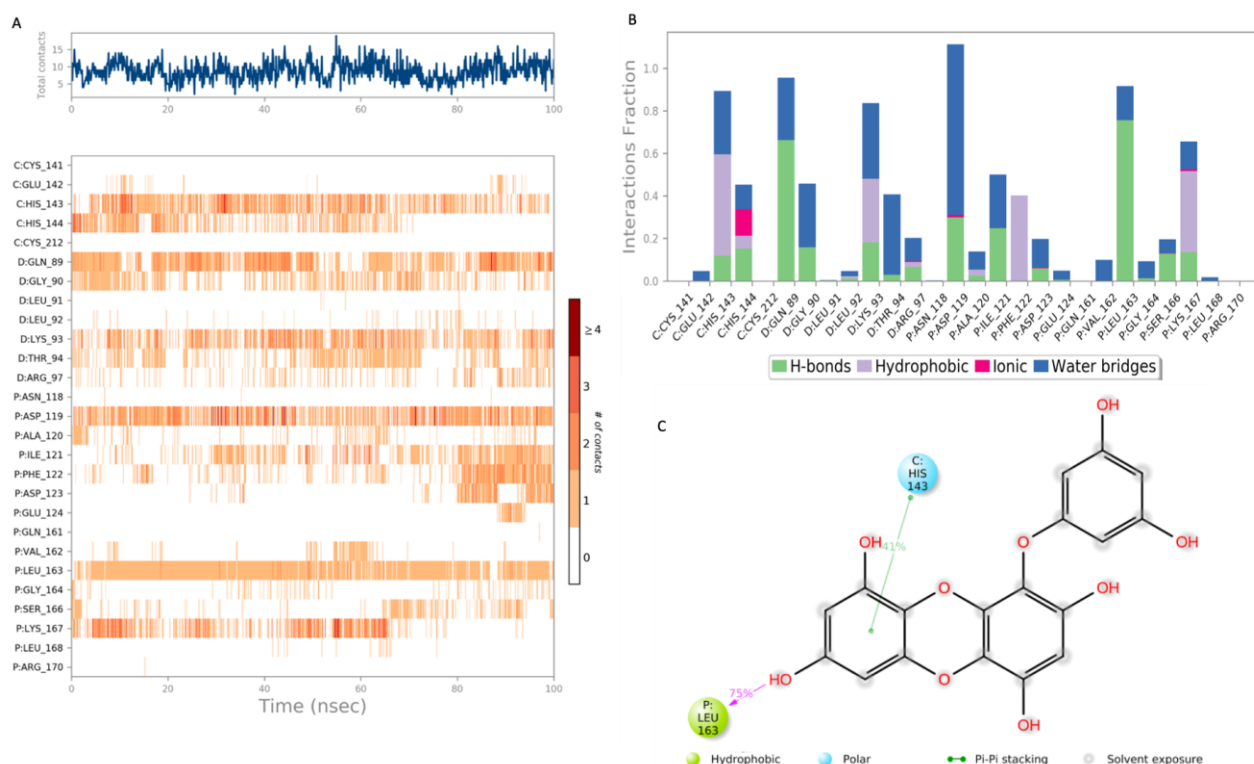

Figure S4: Interaction diagram of eckol with the GTPCH1 binding pocket. (A) Interaction of eckol with residues in each trajectory frame. The depth of color indicating the higher the interaction with contact residues; (B) The protein-ligand contacts showing the bonding interactions fraction and the nature of the interactions; (C) Graphical 2D illustration of eckol interacting with the protein residues during MD simulation. Interactions shown are occurring more than 30% during the simulation time. C: chain C of the GTPCH1 binding pocket, P: chain P of the binding pocket.

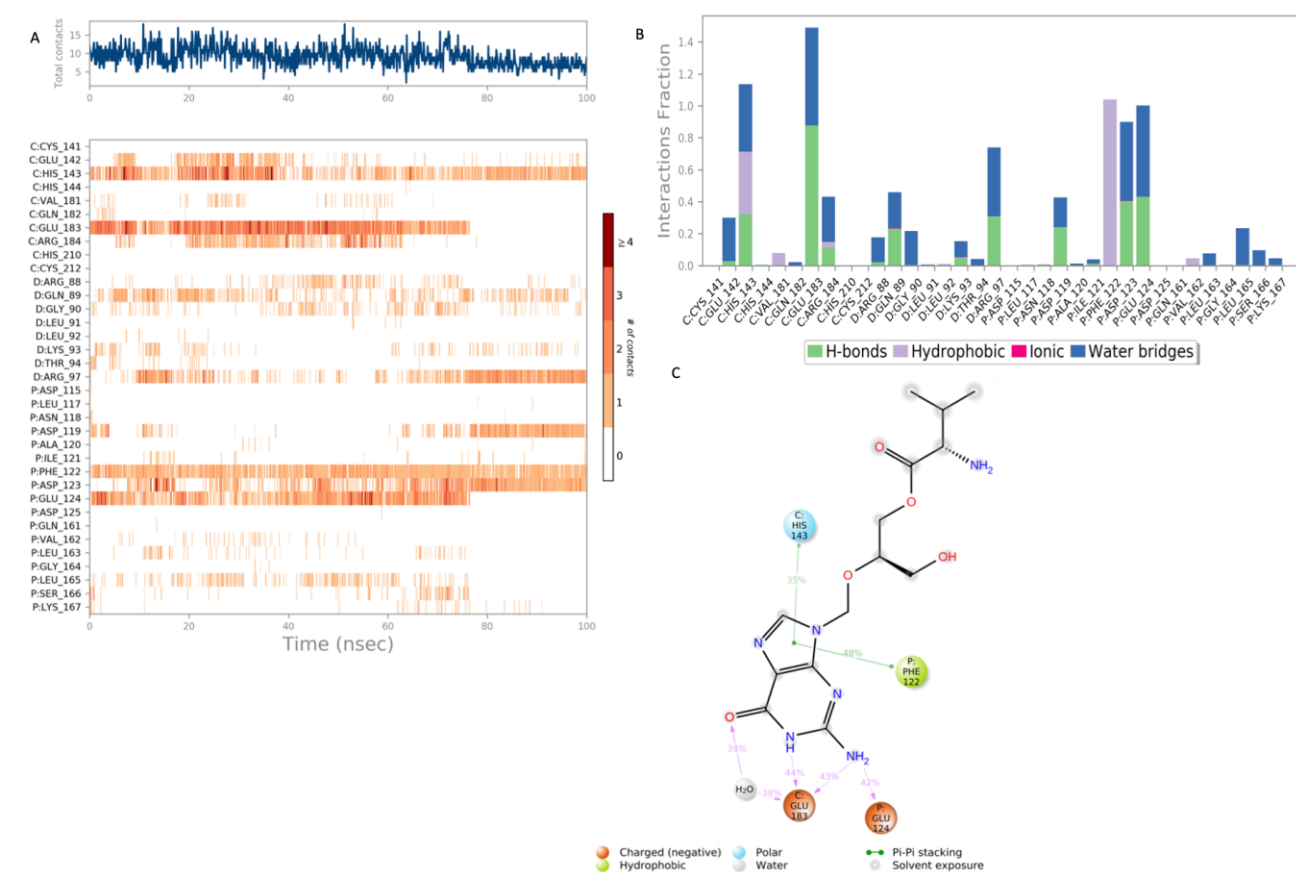

Figure S5: Interaction diagram of valganciclovir with the GTPCH1 binding pocket. (A) Interaction of valganciclovir with residues in each trajectory frame. The depth of color indicating the higher the interaction with contact residues; (B) The protein-ligand contacts showing the bonding interactions fraction and the nature of the interactions; (C) Graphical 2D illustration of valganciclovir interacting with the protein residues during MD simulation. Interactions shown are occurring more than 30% during the simulation time. C: chain C of the GTPCH1 binding pocket, P: chain P of the binding pocket.
